# Supplementary material
Source: MDPI journal article supplement (https://www.mdpi.com/2071-1050/14/20/12958)
Supplement: s1 [file s1]

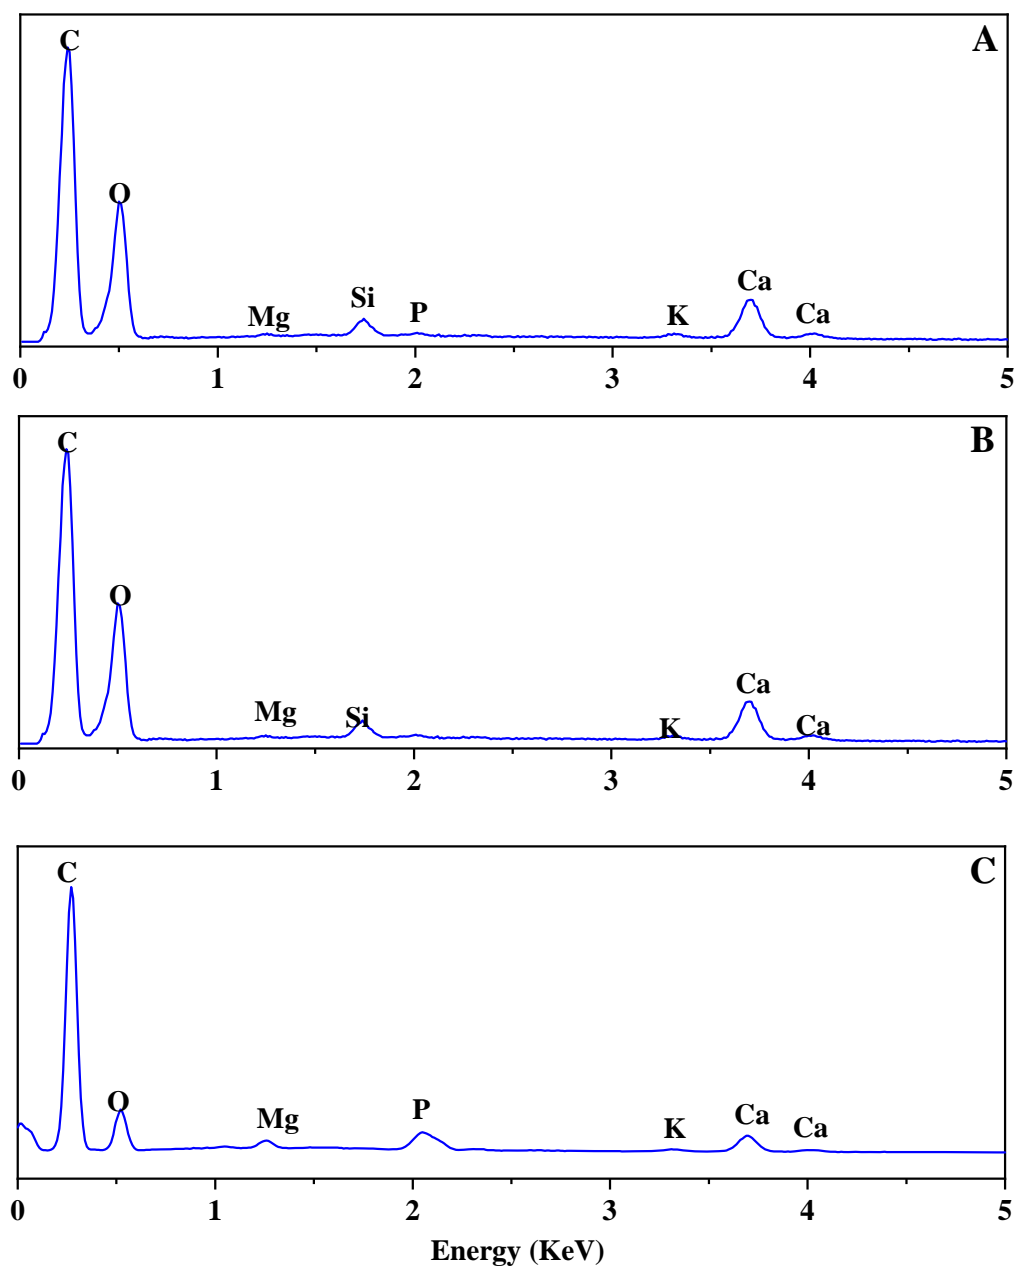

**Supplementary Figure S2.** Energy dispersive spectrometer (EDS) analysis

A: Spent mushroom substrate (SMS); B: Hydrochar derived from spent mushroom substrate (SMHC);  
C: Biochar derived from spent mushroom substrate (SMSBC).
