# Supplementary material
Source: MDPI journal article supplement (https://www.mdpi.com/2071-1050/14/20/12958)
Supplement: s1 [file s1]

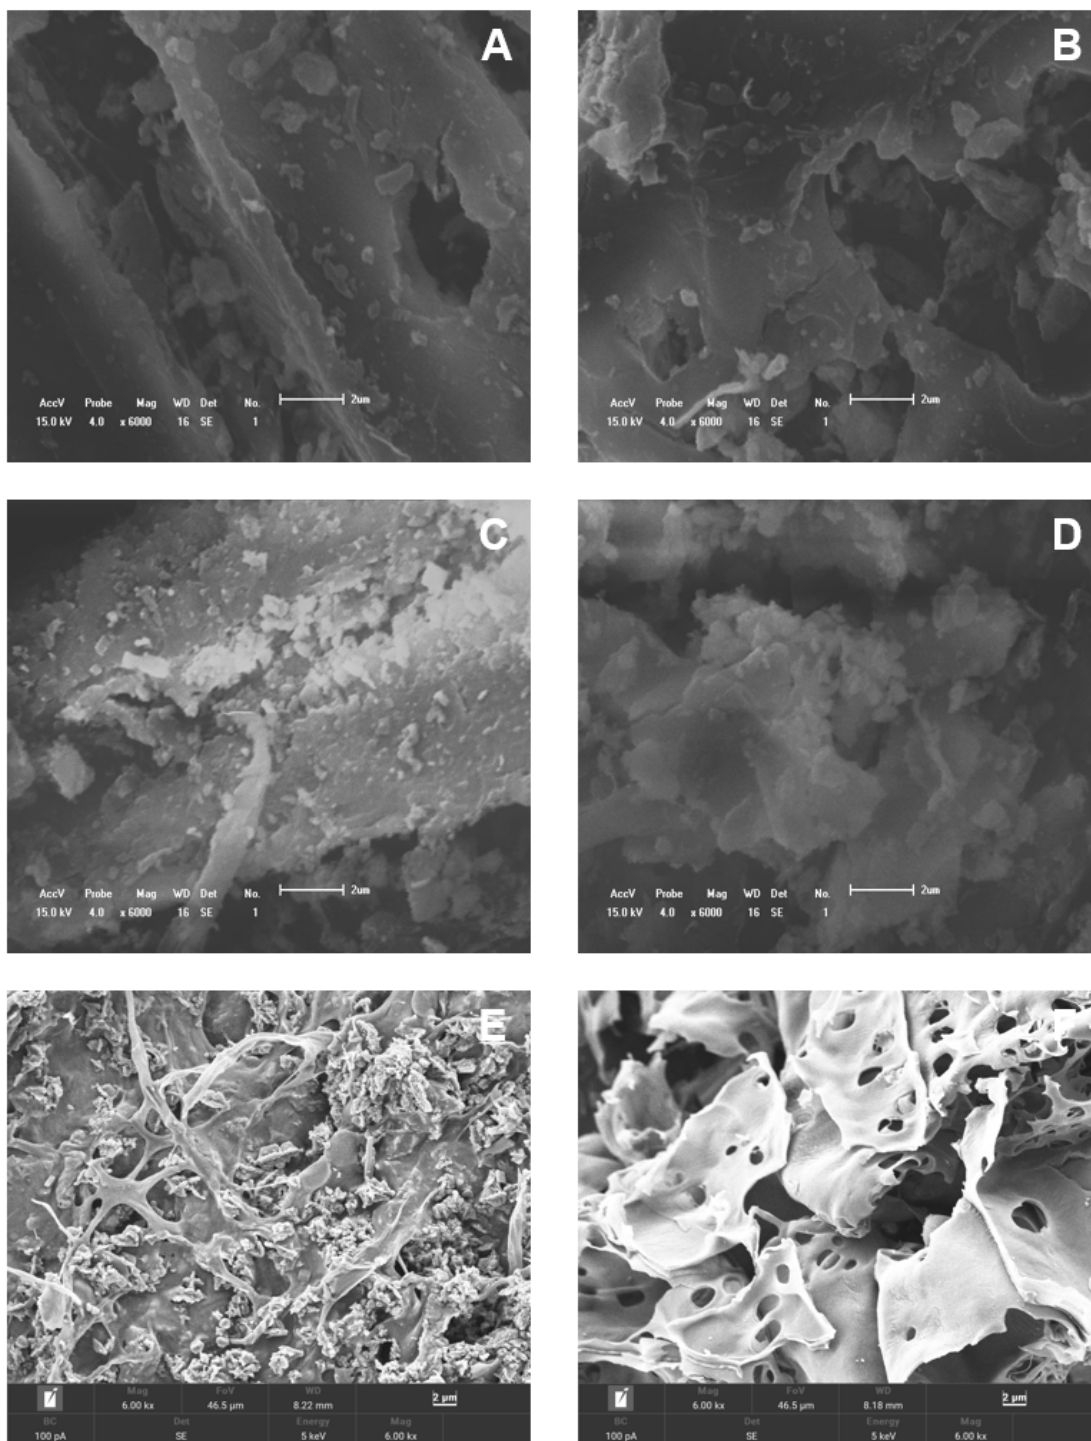

**Supplementary Figure S1.** Scanning electron microscopy (SEM) assay

A and B: Spent mushroom substrate (SMS); C and D: Hydrochar derived from spent mushroom substrate (SMSHC); E and F: Biochar derived from spent mushroom substrate (SMSBC).
