# Supplementary material
Source: MDPI journal article supplement (https://www.mdpi.com/2071-1050/14/20/12958)
Supplement: s1 [file s1]

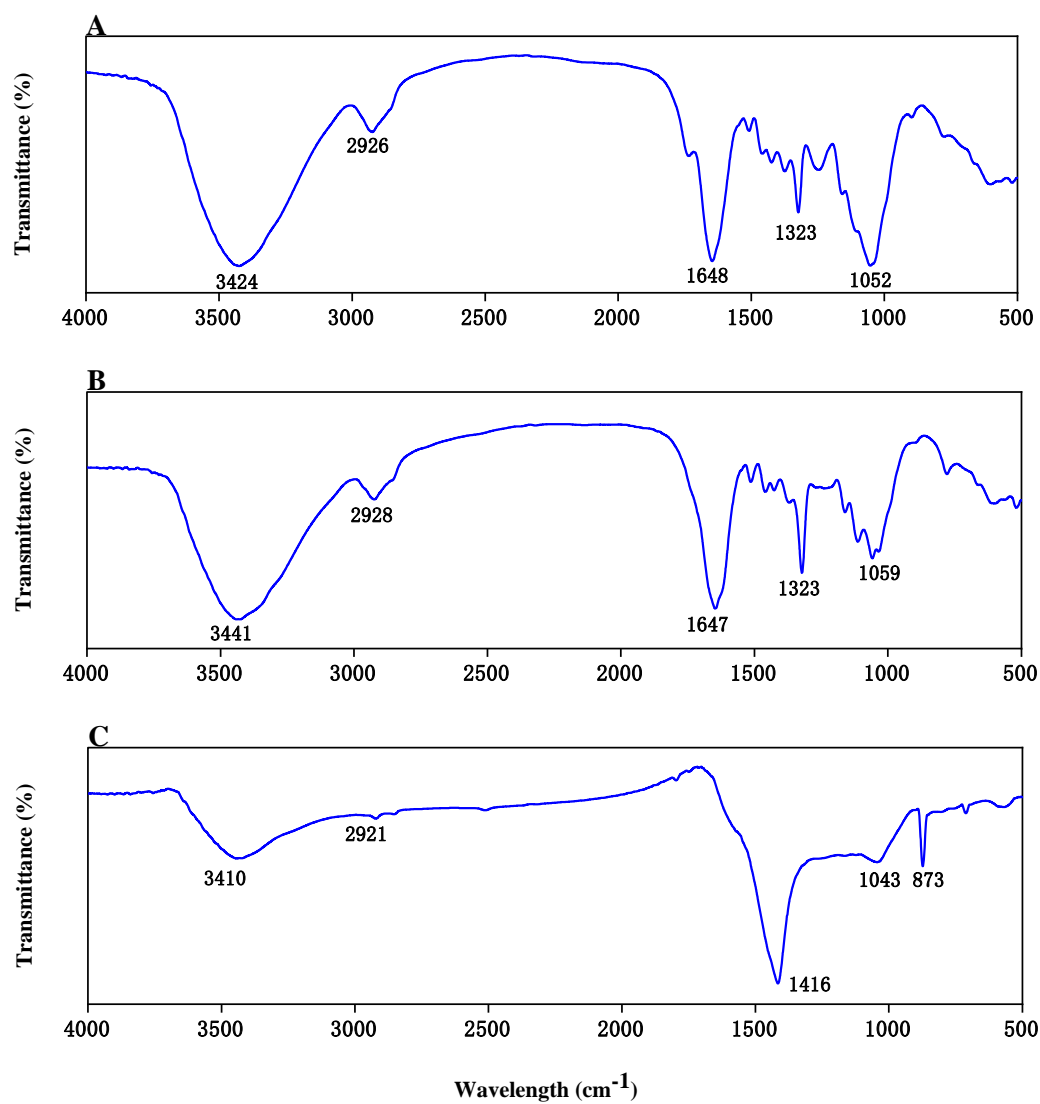

**Supplementary Figure S3.** FTIR spectra

A: Spent mushroom substrate (SMS); B: Hydrochar derived from spent mushroom substrate (SMShC); C: Biochar derived from spent mushroom substrate (SMSBC).
