# Supplementary material
Source: MDPI journal article supplement (https://www.mdpi.com/2071-1050/14/20/12958)

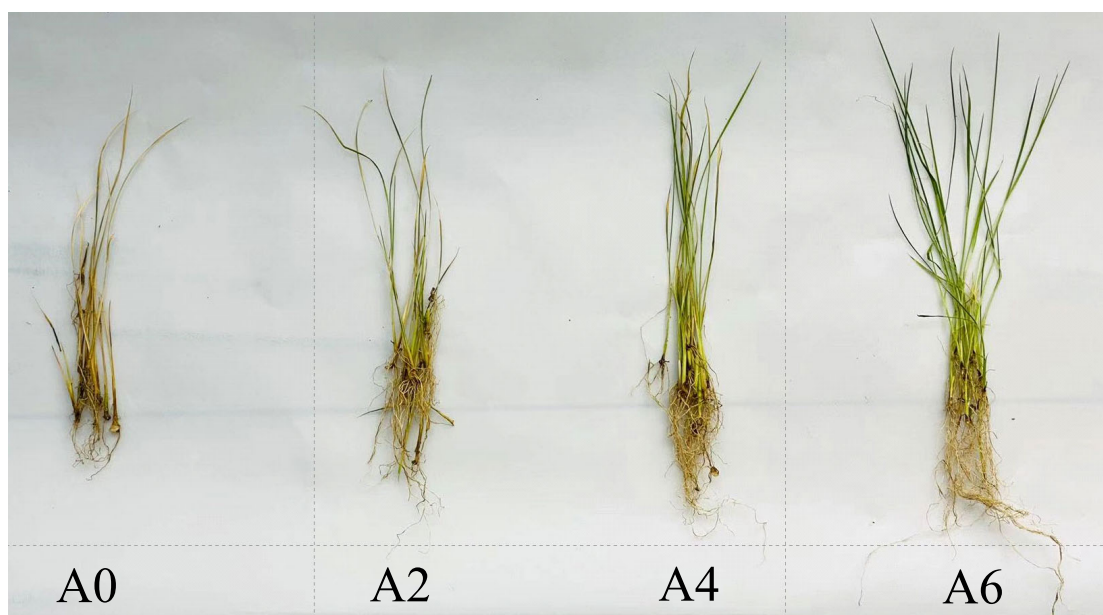

**Supplementary Figure S4.** Harvested rice seedlings from SMSHC-amended soil (group A) on day 28

Supplement: s1 [file s1]
